# Supplementary material
Source: publisher site journal article supplement (http://static.cambridge.org/content/id/urn:cambridge.org:id:article:S0924933819000099/resource/name/S0924933819000099supp002.docx)
Supplement: Supplementary file 1 [file S0924933819000099supp002.docx]

**Supplementary material 2. Correspondence between the neuropsychological tests and the cognitive domains used in the meta-analysis**

| **Cognitive domain** | **Neuropsychological tests** |
| --- | --- |
| **Current IQa** | WAIS-IIIb (Information, Digit Span, Matrix, Block Design, and Arithmetic) and WAIS-Rc |
| **Premorbid IQ** | WTARd, WAIS-III (Vocabulary, Information, and Similarities subtests) and National Adult Reading Test |
| **Executive function** | COWATe and FASf (number of words and semantic categories), Tower of London task (total number of perfect solutions), TMT-Bg, Block design, Stroop interference, WCSTh and Decision-making (Gambling task) |
| **Attention** | Digits Forward (WMS-IIIi), Digits Forward (WAIS-III), CPTj, Time to complete TMT-Ak,and No. of correct items in Stroop words and colours |
| **Working memory** | Backward Digits (WMS-III), Digits Backward and number-letter sequencing (WAIS-III), CANTABl, Spatial Working Memory-errors, and strategy and Spatial Span |
| **Verbal memory and learning** | Rey Auditory Verbal Learning Task (List A total trials and long-term recall), Logical Memory, TAVECm, WMS-R, and WMS-III |
| **Visual memory** | Rey Complex Figure, Visual Paired Associates (part I) and Visual Reproduction (part I) (WMS-Rn), Spatial Recognition and Pattern Recognition (CANTAB) |
| **Processing speed** | Digit Symbol WAIS-III, TMT-A |

aIQ: intelligence quotient; bWAIS-III: Wechsler Adult Intelligence Scale, 3rd edition; cWAIS-R: Wechsler Adult Intelligence Scale-Revised dWTAR: Wechsler Test of Adult Reading; eCOWAT: Controlled Oral Word Association; fFAS: Verbal Fluency test; gTMT-B: Trail Making Test, part B; hWCST: Wisconsin Card Sorting Test Index; iWMS-III: Wechsler Memory Scale-3rd Edition; jCPT: Continuous Performance Test; kTMT-A: Trail Making Test, Part A; lCANTAB: Cambridge Automated Neuropsychological Test Automated Battery; mTAVEC: Test de Aprendizaje Verbal España-Complutense (Spanish version of the California Verbal Learning Test; nWMS-R: Wechsler Memory Scale-Revised
